# Supplementary material
Source: Copernicus journal article supplement (doi:10.5194/tc-20-2589-2026)
Supplement: Supplementary file 1 [file tc-20-2589-2026-supplement.pdf]

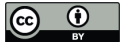

*Supplement of*

**The Eurasian and North American ice sheets at the Last and Penultimate glacial maxima: coupled atmosphere–ice sheet model sensitivity and calibration**

**Violet L. Patterson et al.**

*Correspondence to:* Violet L. Patterson (vip@dmi.dk)

The copyright of individual parts of the supplement might differ from the article licence.

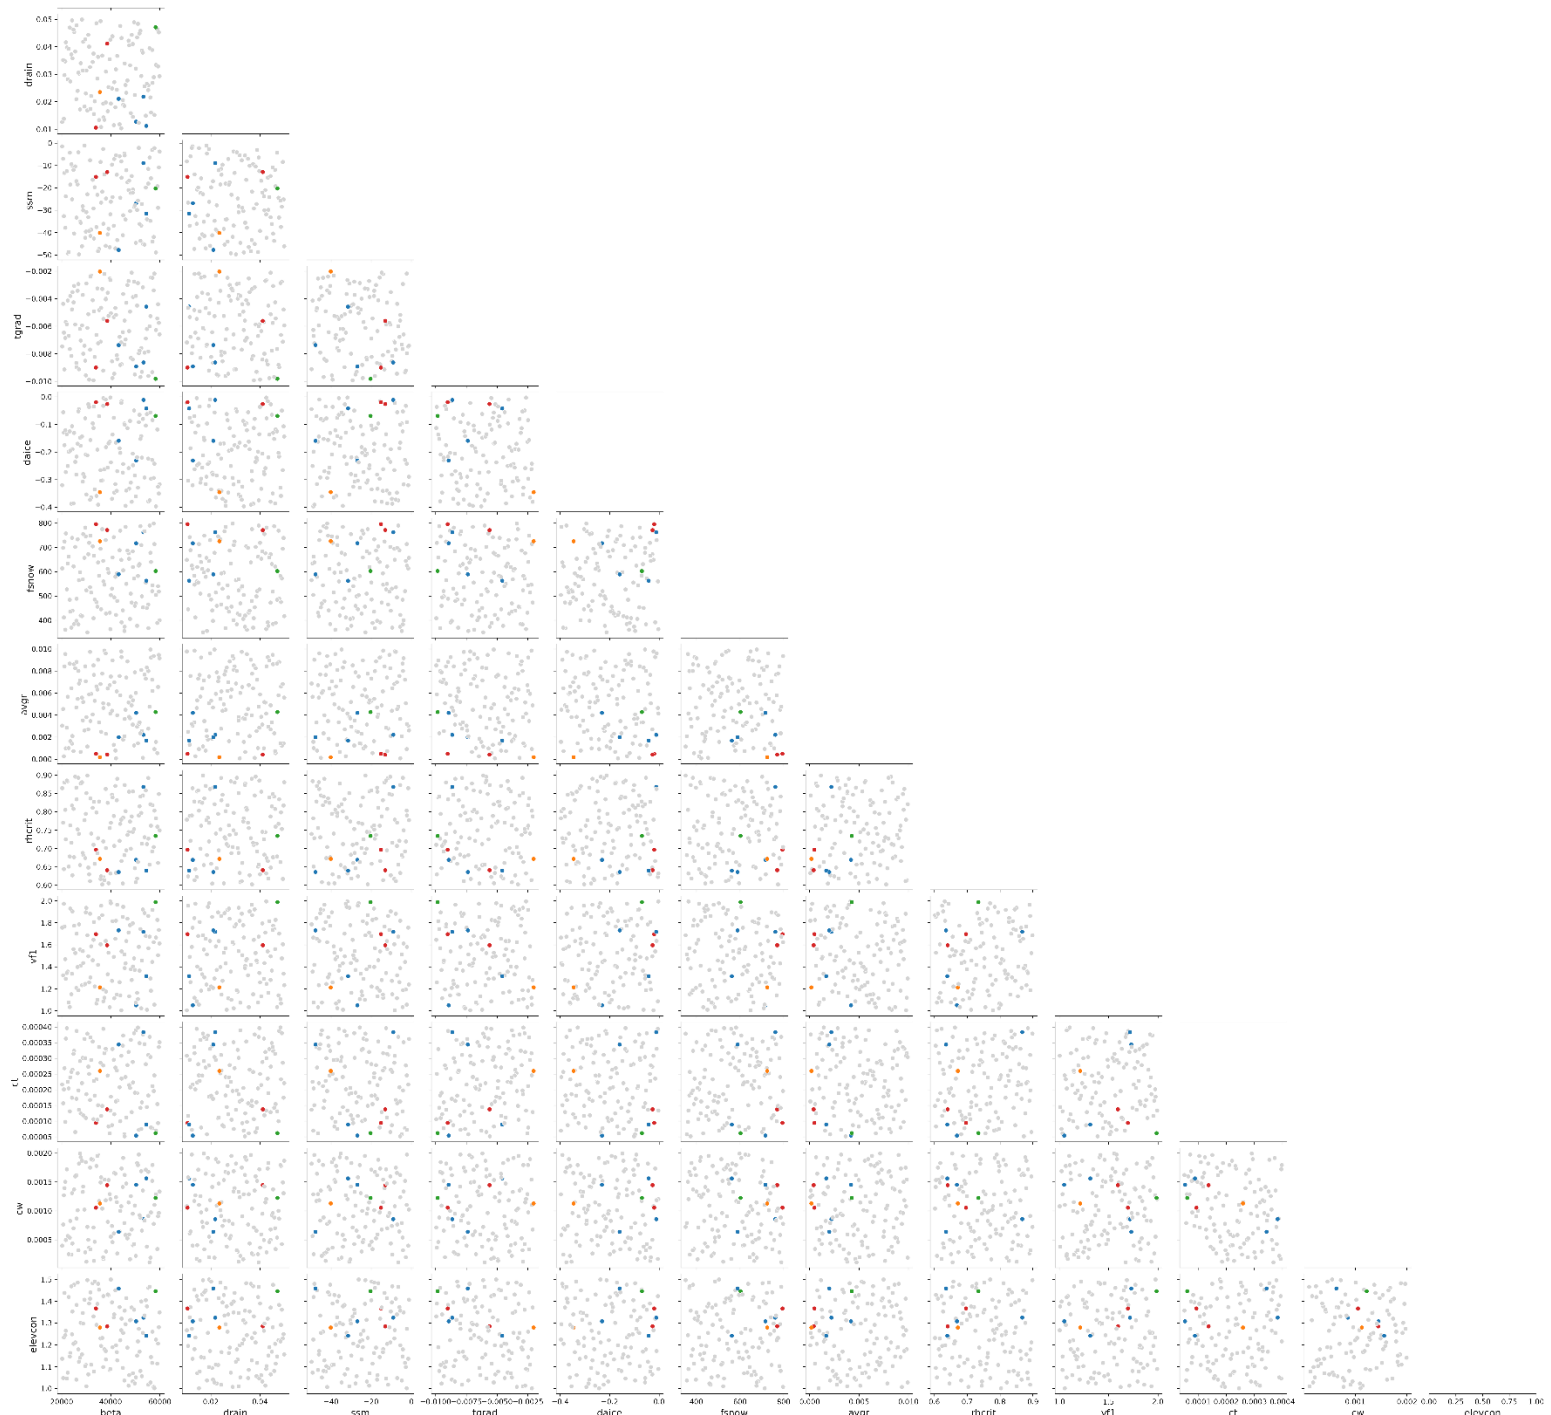

**Figure S1: Parameter pairs plot of all parameters with the NROYa and NROYb simulations in red, NROY extent simulation in orange, NROY volume simulation in green and the four other simulations that meet the North American ice sheet constraints but not the Eurasian in blue.**
